# Supplementary material
Source: PubMed Central journal article supplement (PMC3993119)
Supplement: CVI.00773-13_zcd999094960so1.pdf [file CVI.00773-13_zcd999094960so1.pdf]

Table S1. Amino acid identity (%) of L1 sequences corresponding to the virus-like particles used in this study. Phylogenetic groups are clustered together as described in the Discussion. Black solid boxes represent self-homology of 100%. The table is symmetric.

|       | HPV6 | HPV11 | HPV16 | HPV31 | HPV33 | HPV52 | HPV58 | HPV18 | HPV45 |
|-------|------|-------|-------|-------|-------|-------|-------|-------|-------|
| HPV6  | 100  | 92    | 68    | 69    | 69    | 69    | 70    | 64    | 64    |
| HPV11 | 92   | 100   | 69    | 70    | 68    | 69    | 68    | 62    | 63    |
| HPV16 | 68   | 69    | 100   | 83    | 79    | 79    | 78    | 65    | 65    |
| HPV31 | 69   | 70    | 83    | 100   | 78    | 79    | 77    | 64    | 64    |
| HPV33 | 69   | 68    | 79    | 78    | 100   | 85    | 90    | 64    | 64    |
| HPV52 | 69   | 69    | 79    | 79    | 85    | 100   | 84    | 64    | 64    |
| HPV58 | 70   | 68    | 78    | 77    | 90    | 84    | 100   | 64    | 64    |
| HPV18 | 64   | 62    | 65    | 64    | 64    | 64    | 64    | 100   | 88    |
| HPV45 | 64   | 63    | 65    | 64    | 64    | 64    | 64    | 88    | 100   |
