# Supplementary material
Source: PubMed Central journal article supplement (PMC3993119)
Supplement: CVI.00773-13_zcd999094960so2.pdf [file CVI.00773-13_zcd999094960so2.pdf]

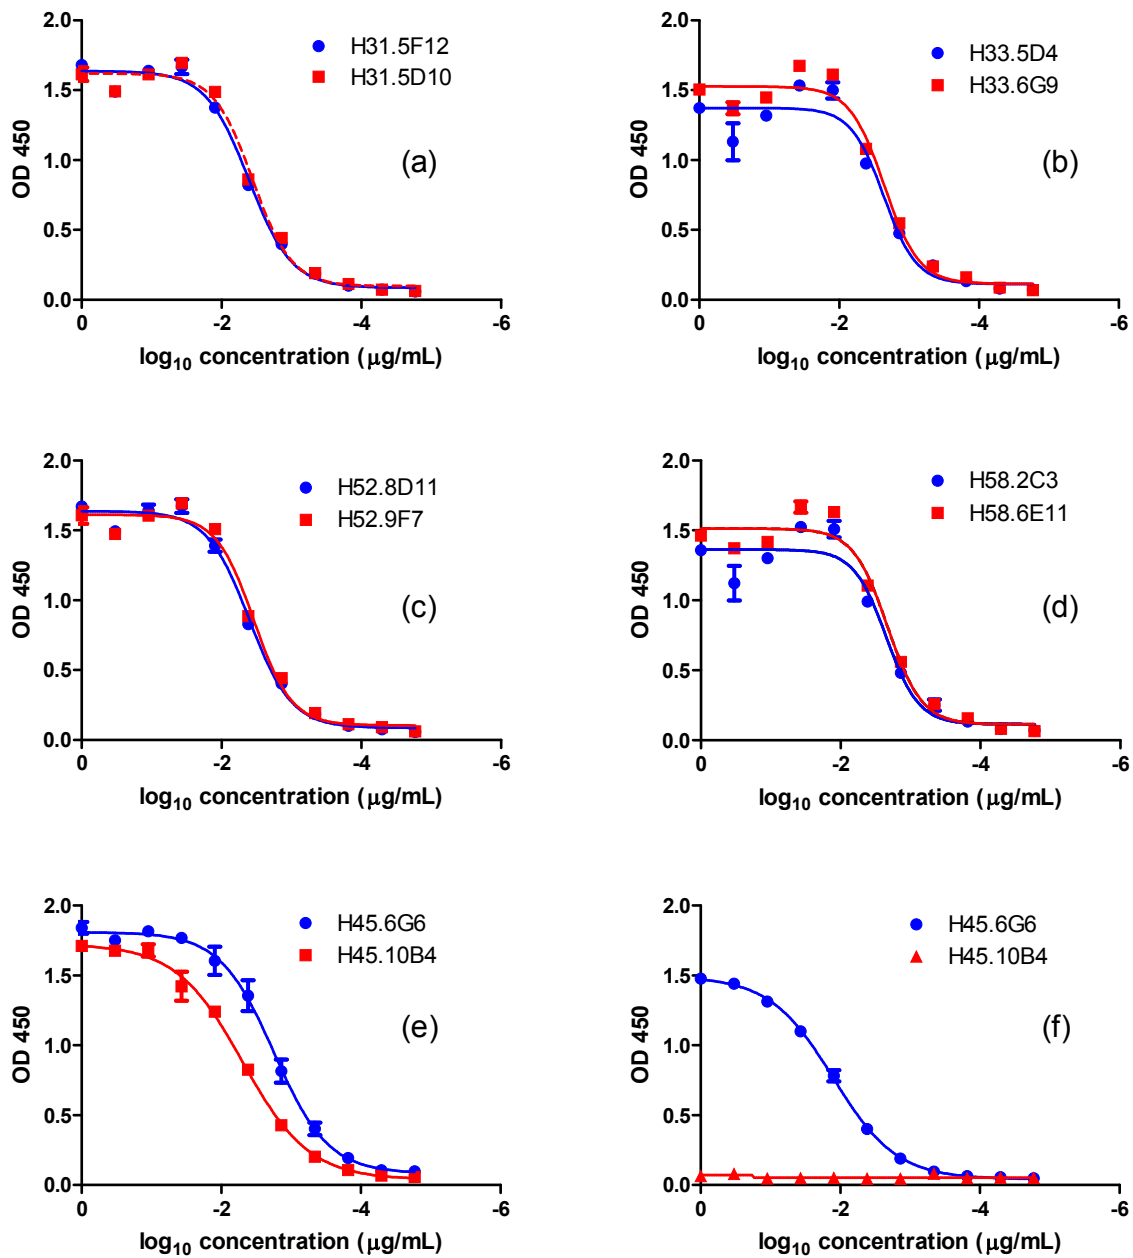

Supplementary Figure 1. Quantitative data from ELISAs for mAbs that recognize intact VLPs, divided by HPV VLP type. (a) HPV31 VLP vs. mAbs H31.5D10 and H31.5F12, (b) HPV33 VLP vs. mAbs H33.5D4 and H33.6G9, (c) HPV52 VLP vs. mAbs H52.9F7 and H52.8D11, (d) HPV58 VLP vs. mAbs H58.2C3 and H58.6E11, (e) HPV45 VLP vs. mAbs H45.10B4 and H45.6G6, (f) HPV18 VLP vs. mAbs H45.10B4 and H45.6G6. Error bars represent the standard error of the mean from replicate data. Fits to the data are shown as solid lines. EC50s from these fits are listed in Table 2.
