# Supplementary material
Source: PubMed Central journal article supplement (PMC3993119)
Supplement: CVI.00773-13_zcd999094960so3.pdf [file CVI.00773-13_zcd999094960so3.pdf]

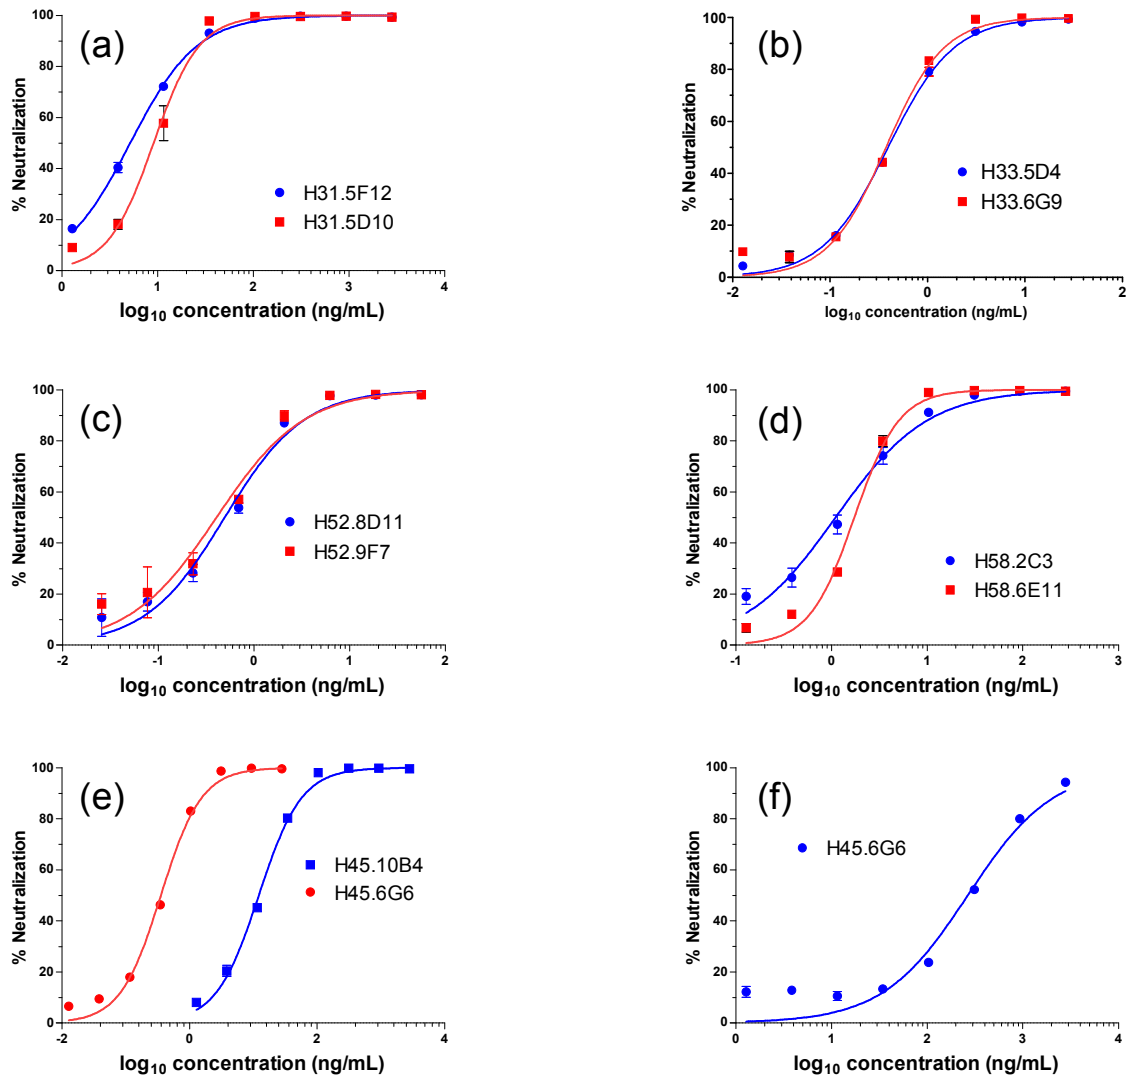

Supplementary Figure 2. Neutralization of HPV pseudovirions by type-specific mAbs: (a) HPV31 by mAbs H31.5D10 and H31.5F12, (b) HPV33 by mAbs H33.5D4 and H33.6G9, (c) HPV52 by mAbs H52.9F7 and H52.8D11, (d) HPV58 by mAbs H58.2C3 and H58.6E11, (e) HPV45 by mAbs H45.10B4 and H45.6G6, (f) HPV18 by mAb H45.6G6. Error bars represent the standard error of the mean from replicate data. Fits to the data are shown as solid lines. EC50s from these fits are listed in Table 2.
